# Supplementary material for: Biocompatibility Study of Electrospun Nanocomposite Membranes Based on Chitosan/Polyvinyl Alcohol/Oxidized Carbon Nano-Onions
Source: MDPI journal article supplement (doi:10.3390/molecules26164753), 2021-08-06
Supplement: s1 [file s1]

# Biocompatibility Study of Electrospun Nanocomposite Membranes Based on Chitosan/Polyvinyl Alcohol/Oxidized Carbon Nano-Onions

Jorge Iván Castro <sup>1</sup>, Manuel N. Chaur <sup>1</sup>, Carlos Humberto Valencia Llano <sup>2</sup>, Mayra Eliana Valencia Zapata <sup>3</sup>, José Hermínsul Mina Hernández <sup>3</sup> and Carlos David Grande-Tovar <sup>4,\*</sup>

<sup>1</sup> Grupo de Investigación SIMERQO, Departamento de Química, Universidad del Valle, Calle 13 No. 100-00, 76001 Cali, Colombia; jorge.castro@correounivalle.edu.co (J.I.C.); manuel.chaur@correounivalle.edu.co (M.N.C.)

<sup>2</sup> Grupo Biomateriales Dentales, Escuela de Odontología, Universidad del Valle, Calle 4B No. 36-00, 76001 Cali, Colombia; carlos.humberto.valencia@correounivalle.edu.co

<sup>3</sup> Grupo de Materiales Compuestos, Escuela de Ingeniería de Materiales, Facultad de Ingeniería, Universidad del Valle, Calle 13 No. 100-00, 760032 Santiago de Cali, Colombia; valencia.mayra@correounivalle.edu.co (M.E.V.Z.); jose.mina@correounivalle.edu.co (J.H.M.H.)

<sup>4</sup> Grupo de Investigación de Fotoquímica y Fotobiología, Facultad de Ciencias, Universidad del Atlántico, Carrera 30 Número 8-49, 081008 Puerto Colombia, Colombia

\* Correspondence: carlosgrande@mail.uniatlantico.edu.co; Tel.: +57-53-599-484

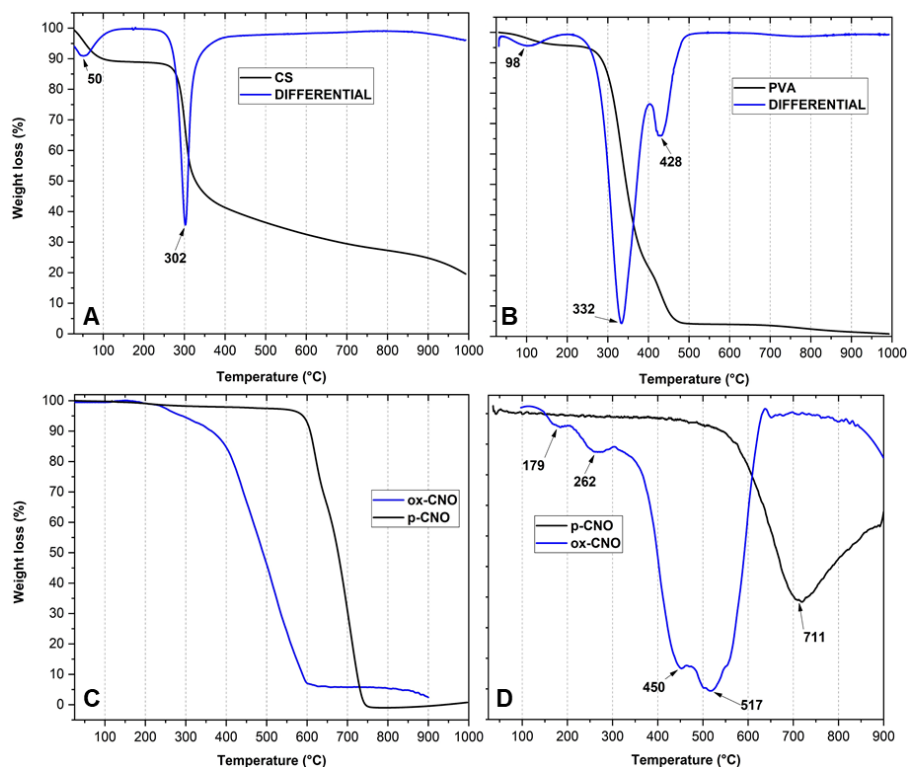

**Figure S1.** TGA curves of the components CS (A), PVA (B), *p*-CNO vs. *ox*-CNO (C), and differential of *p*-CNO vs. *ox*-CNO (D).
